# Supplementary material
Source: publisher figshare collection journal article supplement (https://gsajournals.figshare.com/ndownloader/files/23994320)
Supplement: Supplementary file 1 [file 23994320]

## Sheet: Sheet1
Trait	SNP	Chr	Position (bp)	LD	Study
DFA	AX.170832900	7	50982308	0.543	Marrano et al. 2019
DFA	AX.170832904	7	50987720	0.543	current study
DFA	AX.170892645	9	14786002	0.639/0.503	Marrano et al. 2019
DFA	AX.170892624	9	14771377	0.639	current study
L*	AX.170891746	9	14110666	0.503	current study
